# Supplementary material
Source: PubMed Central journal article supplement (PMC8759029)
Supplement: jamaoncol-e216720-s001.pdf [file jamaoncol-e216720-s001.pdf]

## Supplementary Online Content

Pu CY, Lusk CM, Neslund-Dudas C, Gadgeel S, Soubani AO, Schwartz AG.

Comparison between the 2021 USPSTF lung cancer screening criteria and other lung cancer screening criteria for racial disparity in eligibility. *JAMA Oncol*. Published online January 13, 2022. doi:10.1001/jamaoncol.2021.6720

**eTable 1.** Comparison Between the Different Lung Cancer Screening Criteria  
**eTable 2.** Sensitivity of Modified NCCN With Additional Factors From PLCOm2012 Risk Model for Determining Screening Eligibility in INHALE White (N=625) and African American (N=287) Lung Cancer Cases

This supplementary material has been provided by the authors to give readers additional information about their work.

**eTable 1.** Comparison Between the Different Lung Cancer Screening Criteria

| NLST/NCCN group 1                                                                                                                                                    | 2013 USPSTF                                                                                                                                                          | NCCN group 2                                                                                                                                                                                                                                                                                                                                                                                                                                                                                                                                                                                                                                                       | 2021 USPSTF                                                                                                                                                 | PLCOm2012                                                                                                                                                                                                                                                                                                                                                                                  |
|----------------------------------------------------------------------------------------------------------------------------------------------------------------------|----------------------------------------------------------------------------------------------------------------------------------------------------------------------|--------------------------------------------------------------------------------------------------------------------------------------------------------------------------------------------------------------------------------------------------------------------------------------------------------------------------------------------------------------------------------------------------------------------------------------------------------------------------------------------------------------------------------------------------------------------------------------------------------------------------------------------------------------------|-------------------------------------------------------------------------------------------------------------------------------------------------------------|--------------------------------------------------------------------------------------------------------------------------------------------------------------------------------------------------------------------------------------------------------------------------------------------------------------------------------------------------------------------------------------------|
| <ul style="list-style-type: none"> <li>• Age 55 to 74 years and</li> <li>• ≥ 30 pack-year smoking history and</li> <li>• Smoking cessation &lt; 15 years.</li> </ul> | <ul style="list-style-type: none"> <li>• Age 55 to 80 years and</li> <li>• ≥ 30 pack-year smoking history and</li> <li>• Smoking cessation &lt; 15 years.</li> </ul> | <ul style="list-style-type: none"> <li>• Age ≥ 50 years and</li> <li>• ≥ 20 pack-year smoking history and</li> <li>• 1 additional risk factor (other than secondhand smoke).                             <ul style="list-style-type: none"> <li>○ cancer history</li> <li>○ family history of lung cancer</li> <li>○ radon exposure</li> <li>○ occupational exposure                                     <ul style="list-style-type: none"> <li>▪ silica, cadmium, asbestos, arsenic, beryllium, chromium (VI), diesel fumes, and nickel.</li> </ul> </li> <li>○ chronic obstructive pulmonary disease (COPD)</li> <li>○ pulmonary fibrosis</li> </ul> </li> </ul> | <ul style="list-style-type: none"> <li>• Age ≥ 50 years and</li> <li>• ≥ 20 pack-year smoking history</li> <li>• Smoking cessation &lt; 15 years</li> </ul> | <ul style="list-style-type: none"> <li>• Age</li> <li>• Race</li> <li>• Education</li> <li>• BMI</li> <li>• COPD</li> <li>• Personal history of cancer</li> <li>• Family history of cancer</li> <li>• Smoking status</li> <li>• Smoking intensity</li> <li>• Duration of smoking</li> <li>• Smoking quit time</li> </ul> <p>Risk ≥ 1.51% was used as cut off for screening eligibility</p> |

**eTable 2.** Sensitivity of Modified NCCN With Additional Factors From PLCOm2012 Risk Model for Determining Screening Eligibility in INHALE White (N=625) and African American (N=287) Lung Cancer Cases

|                                             | All<br>n=912 | White<br>n=625 | African<br>American<br>n=287 | <i>P</i> value<br>White vs<br>African<br>American |
|---------------------------------------------|--------------|----------------|------------------------------|---------------------------------------------------|
| USPSTF 2021                                 | 590 (64.7)   | 408 (65.3)     | 182 (63.4)                   | 0.636                                             |
| USPSTF 2021 + COPD                          | 241 (26.4)   | 186 (29.8)     | 55 (19.2)                    | 0.001                                             |
| USPSTF 2021 + previous cancer               | 123 (13.5)   | 96 (15.4)      | 27 (9.4)                     | 0.013                                             |
| USPSTF 2021 + family history of lung cancer | 153 (16.7)   | 115 (18.4)     | 38 (13.2)                    | 0.065                                             |
| USPSTF 2021 + COPD or PC or FHLC            | 370 (40.6)   | 276 (44.2)     | 94 (32.8)                    | 0.001                                             |

COPD = chronic obstructive pulmonary disease; PC = previous cancer diagnosis; FHLC = family history of lung cancer
